# Supplementary material
Source: publisher figshare collection journal article supplement (https://karger.figshare.com/ndownloader/files/33157667)
Supplement: Supplementary file 1 [file 33157667]

**Table S1.** **The correlation between changes in type2 inflammatory biomarkers and ΔFEV1**

|  | R | P value |
| --- | --- | --- |
| ΔFeNO50 (ppb) | -0.18 | 0.053 |
| ΔJ’awNO(2CM) (pl/s) | -0.16 | 0.08 |
| ΔCANO(2CM) (ppb) | -0.21 | 0.03 |
| ΔCANO(TMAD) (ppb) | -0.10 | 0.27 |
| ΔBlood eosinophil counts (/μL) | -0.17 | 0.14 |

Δ means changes in clinical variables

FEV1: forced expiratory volume in one second

FeNO50: fraction of exhaled nitric oxide measured at an expiratory flow rate of 50 mL/s

J’awNO: total flux of NO in the airway compartment

CANO: alveolar concentrations of nitric oxide

2CM: two-compartment model

TMAD: trumpet model with axial diffusion
